# Supplementary material
Source: publisher figshare collection journal article supplement (https://sage.figshare.com/ndownloader/files/13438775)
Supplement: Supplementary file 1 [file 13438775]

**Supplementary Table S1.** Associations between ADHD and contact with police for traffic violations

| Variable                               | Odds Ratio | 95% Confidence Interval |
|----------------------------------------|------------|-------------------------|
| ADHD                                   | 1.07       | 0.64, 1.79              |
| 20–29 years                            | 2.10       | 1.56, 2.84              |
| 30–39 years                            | 1.93       | 1.43, 2.59              |
| Male                                   | 2.03       | 1.65, 2.48              |
| White                                  | 1.44       | 1.08, 1.91              |
| Residing in urban area                 | 1.18       | 0.92, 1.51              |
| Lower income                           | 1.07       | 1.03, 1.11              |
| Alberta                                | 1.60       | 1.17, 2.19              |
| British Columbia                       | 1.13       | 0.81, 1.57              |
| Manitoba                               | 1.16       | 0.79, 1.69              |
| New Brunswick                          | 0.70       | 0.47, 1.04              |
| Newfoundland and Labrador              | 0.92       | 0.55, 1.52              |
| Nova Scotia                            | 0.97       | 0.67, 1.41              |
| Prince Edward Island                   | 1.38       | 0.75, 2.55              |
| Quebec                                 | 1.42       | 1.06, 1.91              |
| Saskatchewan                           | 1.05       | 0.72, 1.52              |
| Chronic condition                      | 0.96       | 0.78, 1.18              |
| Medication for mental health/addiction | 1.20       | 0.81, 1.78              |
| Mood disorder                          | 1.29       | 0.85, 1.97              |
| Substance use disorder                 | 1.87       | 1.39, 2.51              |

The 15–19 years age group was set as the age reference and Ontario was set as the provincial reference.
